# Supplementary material for: Systems biology network-based discovery of a small molecule activator BL-AD008 targeting AMPK/ZIPK and inducing apoptosis in cervical cancer
Source: PubMed Central journal article supplement (PMC4480736; doi:10.18632/oncotarget.3513), 2015-03-10
Supplement: oncotarget-06-8071-s001.pdf [file oncotarget-06-8071-s001.pdf]

# Systems biology network-based discovery of a small molecule activator BL-AD008 targeting AMPK/ZIPK and inducing apoptosis in cervical cancer

## Supplementary Material

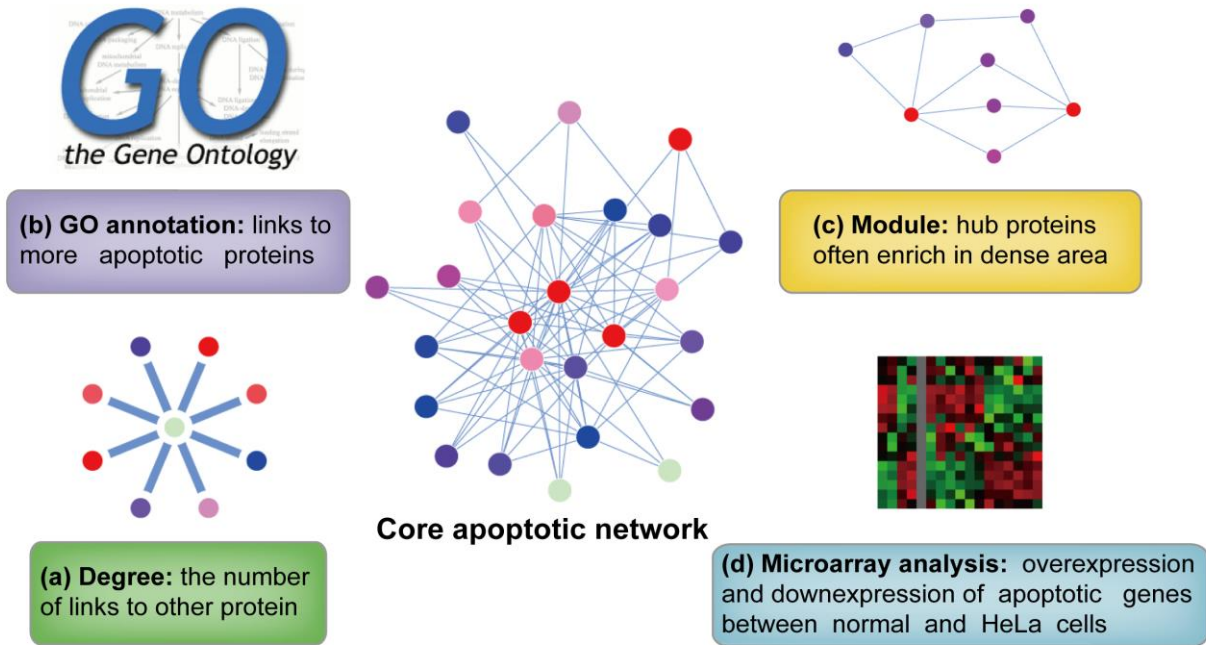

Figure S1: Multiple analyses of the apoptotic hub proteins/targets in cancer.



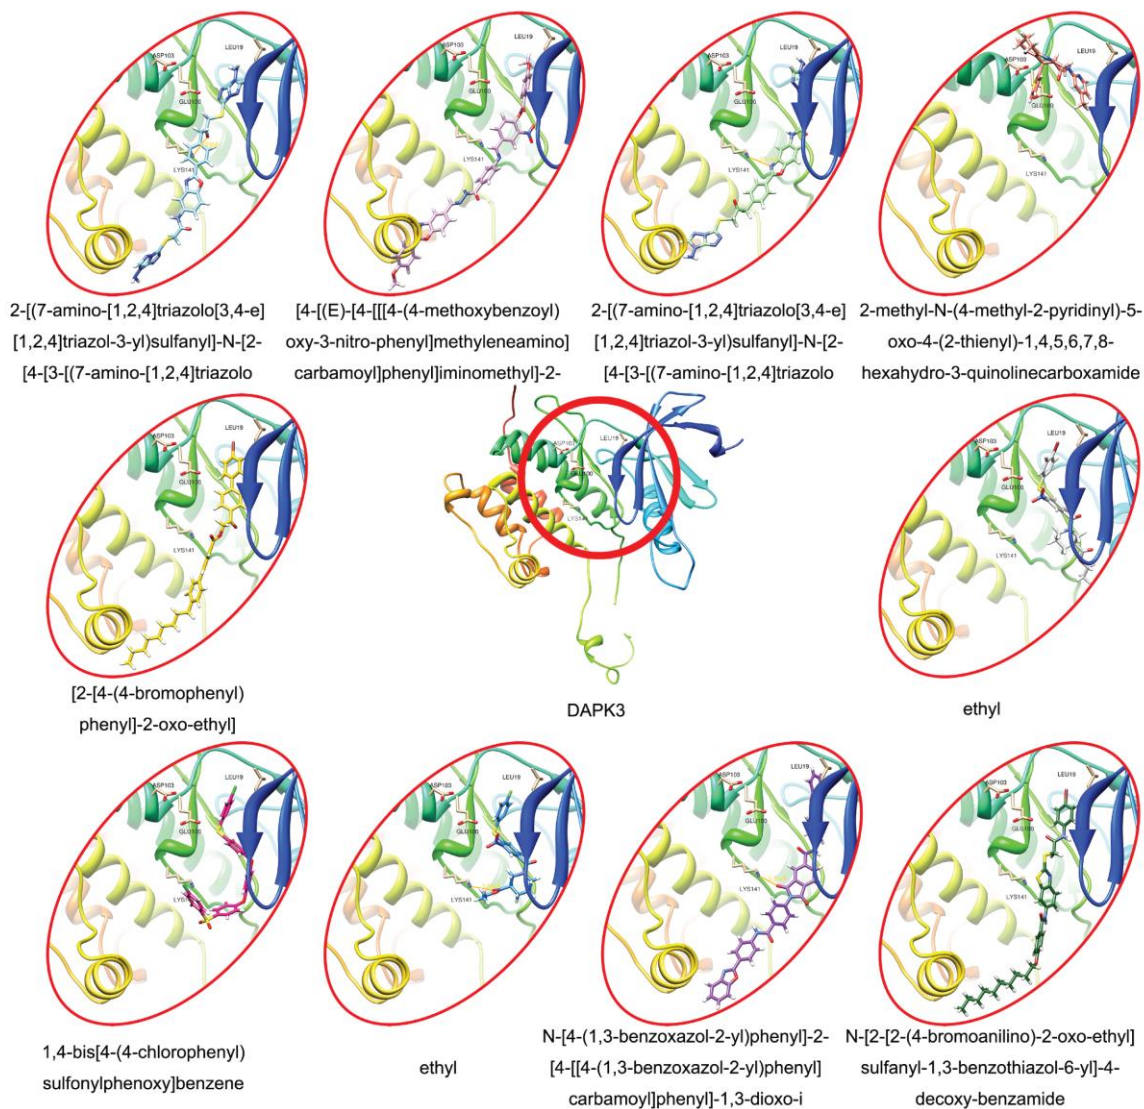

**Figure S3: The consensus results of the top ten candidate compounds targeting ZIPK from Drugbank and ZINC.**

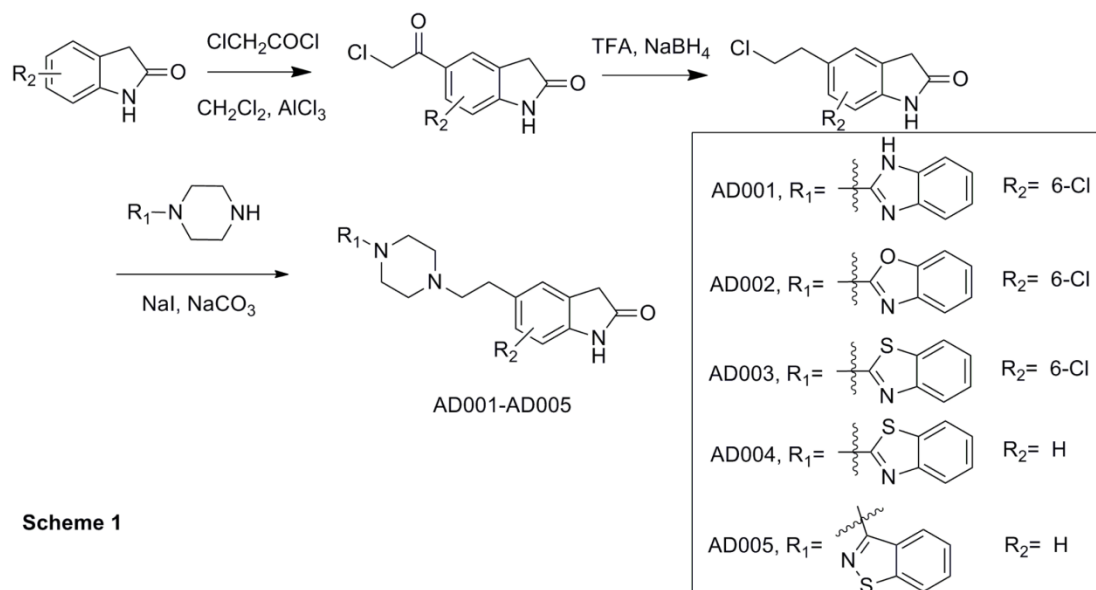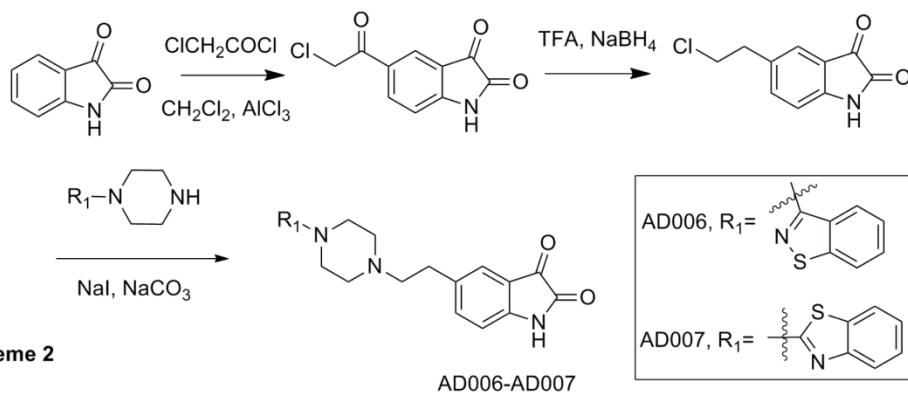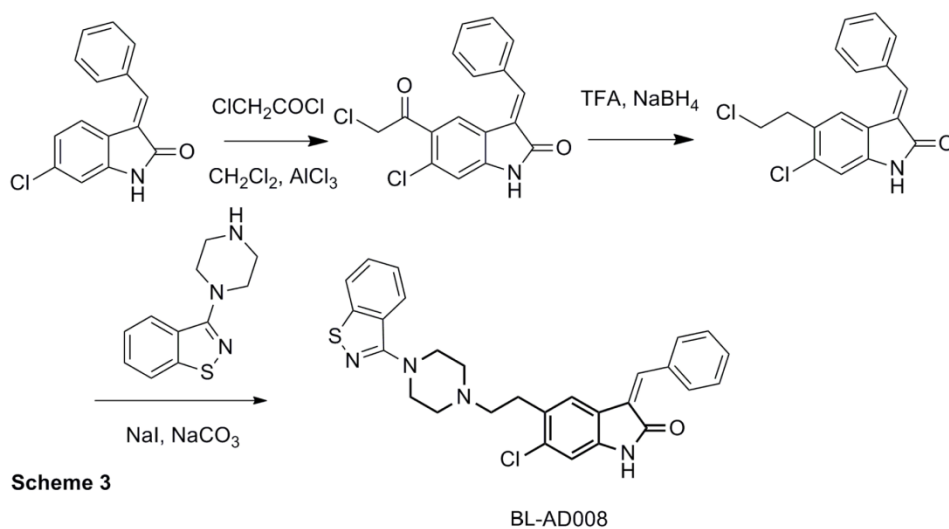

**Figure S4: The synthesis of BL-AD008 as a novel dual-target activator.**

**Table S1: Integration of data sources for predicting human protein-protein interactions.**

| <b>Prediction type</b>    | <b>Dataset name</b>                      | <b>Time stamping</b> | <b>Element number</b> |
|---------------------------|------------------------------------------|----------------------|-----------------------|
| Co-expression             | Pairwise co-expression set               | 2014/10/14           | 8, 030, 028           |
| Enriched domain pair      | Domain-domain interaction set            | 2014/11/17           | 148, 938              |
| Ortholog interactions     | Interolog mapping PPI set                | 2014/5/10            | 7, 090                |
| Shared biological process | Shared biological process enrichment set | 2014/10/04           | 31, 318               |
| <b>Gold standard</b>      | <b>Data set</b>                          | <b>Time stamping</b> | <b>Element number</b> |
| Positive(GSP)             | Good standard positive set               | 2014/10/05           | 85, 083               |
|                           | Testing set                              | 2014/5/10            | 25, 620               |
| Negative(GSN)             | Good standard negative set               | 2014/5/14            | 23, 169, 177          |
| Raw pair                  | Raw protein-protein interaction set      | 2014/5/14            | 204, 919, 890         |

**Table S2: Protein-protein interactors from core apoptotic subnetwork.****Table S3: The interactors with AMPK in apoptosis.****Table S4: The interactors with ZIPK in apoptosis.**

**Table S5: Modified candidate small molecule compounds from A1 to A10.**

| <b>Compou<br/>nd</b> | <b>IUPAC Name</b>                                                                          | <b>Chemical<br/>Structures</b>                                                        |
|----------------------|--------------------------------------------------------------------------------------------|---------------------------------------------------------------------------------------|
| A-1                  | 5-(2-(4-(benzo[d]isothiazol-3-yl)piperazin-1-yl)ethyl)-6-chloroindolin-2-one               | 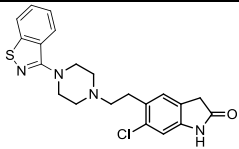   |
| AD-001               | 5-(2-(4-(1H-benzo[d]imidazol-2-yl)piperazin-1-yl)ethyl)-6-chloroindolin-2-one              |    |
| AD-002               | 5-(2-(4-(benzo[d]oxazol-2-yl)piperazin-1-yl)ethyl)-6-chloroindolin-2-one                   |    |
| AD-003               | 5-(2-(4-(benzo[d]thiazol-2-yl)piperazin-1-yl)ethyl)-6-chloroindolin-2-one                  |    |
| AD-004               | 5-(2-(4-(benzo[d]thiazol-2-yl)piperazin-1-yl)ethyl)indolin-2-one                           |    |
| AD-005               | 5-(2-(4-(benzo[d]isothiazol-3-yl)piperazin-1-yl)ethyl)indolin-2-one                        |   |
| AD-006               | 5-(2-(4-(benzo[d]isothiazol-3-yl)piperazin-1-yl)ethyl)indoline-2,3-dione                   |  |
| AD-007               | 5-(2-(4-(benzo[d]thiazol-2-yl)piperazin-1-yl)ethyl)indoline-2,3-dione                      |  |
| <b>BL-AD-008</b>     | 5-(2-(4-(benzo[d]isothiazol-3-yl)piperazin-1-yl)ethyl)-3-benzylidene-6-chloroindolin-2-one |  |

**Table S6: Binding free energies and individual energy terms of BL-AD008 in complex with both AMPK and ZIPK (kcal/mol).**

| Contribution                            | AD008-AMPK    | AD008-ZIPK   |
|-----------------------------------------|---------------|--------------|
| $\Delta E_{\text{int}}^{\text{ele}}$    | -7.11(0.23)   | -0.91(0.04)  |
| $\Delta E_{\text{int}}^{\text{vdw}}$    | -38.04 (0.39) | -31.52(0.40) |
| $\Delta G_{\text{sol}}^{\text{nonpol}}$ | -4.2(0.04)    | -3.66(0.05)  |
| $\Delta G_{\text{sol}}^{\text{ele}}$    | 21.73(0.27)   | 12.82(0.56)  |
| $\Delta G_{\text{sol}}^{\text{a}}$      | 17.53(0.26)   | 9.16(0.52)   |
| $\Delta G_{\text{ele}}^{\text{b}}$      | 14.62(0.38)   | 11.91(0.59)  |
| $-\Delta S$                             | -12.7         | -10.9        |
| $\Delta G_{\text{bind}}$                | -40.12(0.41)  | -34.18(0.34) |

<sup>a</sup> The polar/nonpolar ( $\Delta G_{\text{sol}}^{\text{ele}} + \Delta G_{\text{sol}}^{\text{nonpol}}$ ) contributions.

<sup>b</sup> The electrostatic ( $\Delta E_{\text{int}}^{\text{ele}} + \Delta G_{\text{sol}}^{\text{ele}}$ ) contributions. All energies are averaged over 300 snapshots and are given in kcal/mol. Calculation of  $\Delta G_{\text{bind}}$  does not explicitly consider entropy contributions. The values in parentheses represent the standard error of the mean.
